# Supplementary material for: Weak Coordinating Character of Organosulfonates in Oriented Silica Films: An Efficient Approach for Immobilizing Cationic Metal-Transition Complexes
Source: MDPI journal article supplement (doi:10.3390/molecules27175444), 2022-08-25
Supplement: s1 [file s1]

## Supporting Information

# **Non-innocent weak coordinating character of organosulfonates assisted by hydrogen bonding in oriented silica films: an efficient approach for immobilizing cationic metal-transition complexes**

**Samuel Ahoulou<sup>1,2</sup>, Clara Richart,<sup>1</sup> Cédric Carteret,<sup>1</sup> Sébastien Pillet,<sup>2\*</sup> Neus Vilà<sup>1\*</sup> and Alain Walcarius<sup>1\*</sup>**

<sup>1</sup> *Université de Lorraine, CNRS, LCPME, Nancy, France*

<sup>2</sup> *Université de Lorraine, CNRS, CRM2, Nancy, France*

\* Correspondence: neus.vila@univ-lorraine.fr; sebastien.pillet@univ-lorraine.fr; alain.walcarius@univ-lorraine.fr;

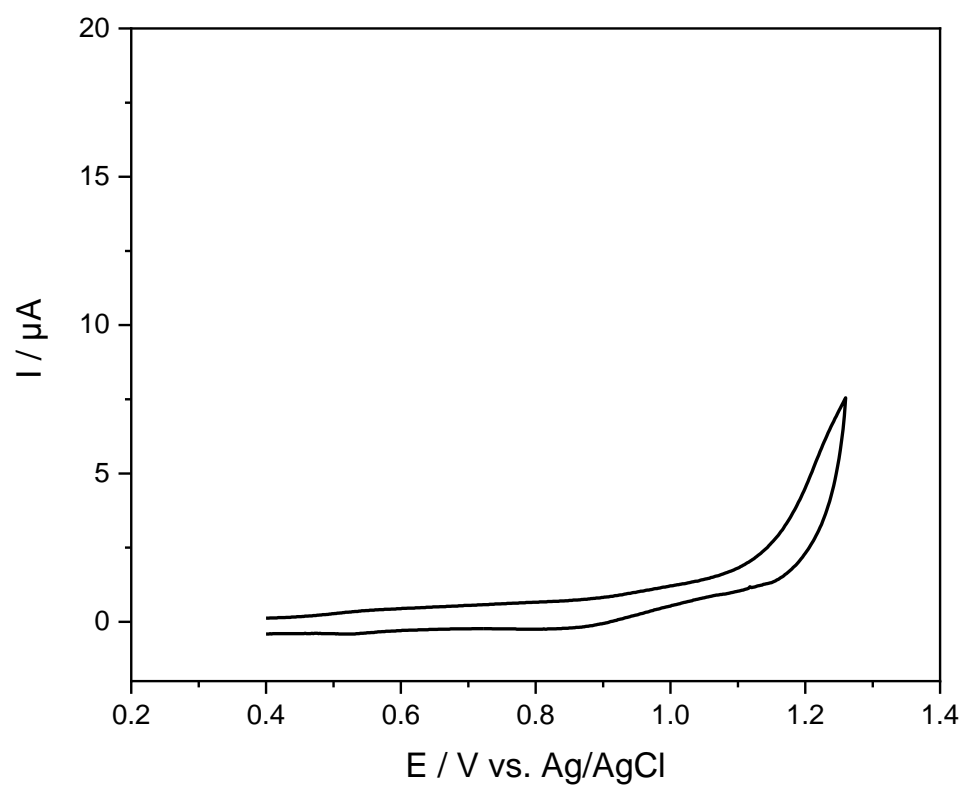

**Figure S1.** Cyclic voltammograms recorded in aqueous 0.1M  $\text{NaNO}_3$  solution after impregnation of a silica film in 10 mM  $\text{FeCl}_3 \cdot 6\text{H}_2\text{O}$  solution for 2h. The silica film was prepared by EASA method from a solution containing 200 mM of hydrolyzed tetraethoxysilane, 64 mM CTAB and 0.1 M  $\text{NaNO}_3$ .

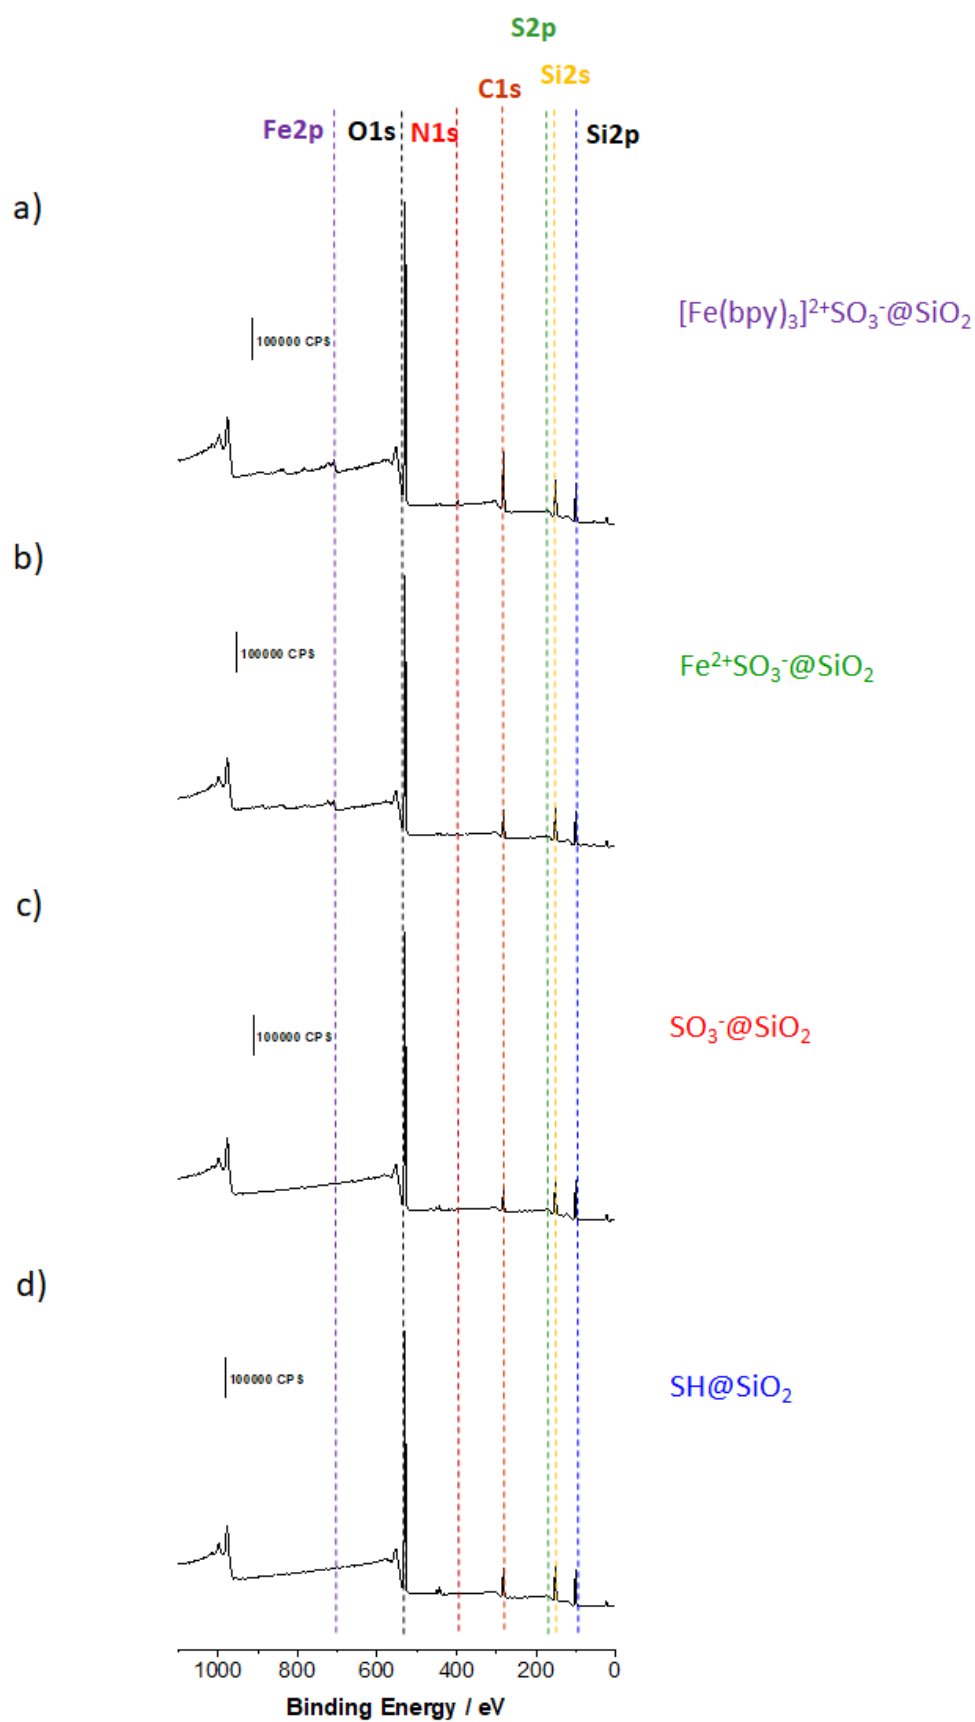

**Figure S2.** XPS survey spectra obtained for various functionalized silica films on ITO, respectively (a)  $[\text{Fe}(\text{bpy})_3]^{2+}\text{SO}_3^-@ \text{SiO}_2$ , (b)  $\text{Fe}^{2+}\text{SO}_3^-@ \text{SiO}_2$ , (c)  $\text{SO}_3^-@ \text{SiO}_2$ , and (d)  $\text{SH}@ \text{SiO}_2$ .
